# Supplementary material for: An ultrastable metal–organic material emits efficient and broadband bluish white-light emission for luminescent thermometers
Source: Royal Society of Chemistry journal article supplement (doi:10.1039/c8cc08726a), 2018-12-12
Supplement: c8cc08726a1.pdf [file c8cc08726a1.pdf]

## Supporting Information

# An Ultrastable Metal-Organic Material Emits Efficient and Broadband Bluish White-Light Emission for Luminescent Thermometer

Jinlin Yin, Guiyang Zhang, Chengdong Peng and Honghan Fei\*

School of Chemical Science and Engineering, Shanghai Key Laboratory of Chemical Assessment and Sustainability, Tongji University, Shanghai 200092, P. R. China

## Experimental Section

**Materials.** Starting materials and solvents were used without further purification from commercial supplier unless otherwise indicated. Antimonous chloride ( $\text{SbCl}_3$ , 99.0%, Adamas), 1,2-Ethylenediphosphonic acid (EDP, >98.0%, Adamas-beta), hydrochloric acid (38.0% in  $\text{H}_2\text{O}$ , SCR), ethanol (>99.9%, Aladdin), High vacuum grease (HVG, Dow corning).

**Solvothermal synthesis of TJU-12.** 0.28 g  $\text{SbCl}_3$  (1.0 mmol), 0.38 g 1,2-Ethylenediphosphonic acid (2.0 mmol) and hydrochloric acid (1.54 mL) were completely dispersed in 10 mL EtOH by magnetic stirring for 15min. Then, the mixture was transferred to a 15 mL Teflon-lined autoclave reactor, which was statically heated at 175 °C for 72 h. After the autoclave was cooled to room temperature, colorless plate-like crystals of TJU-12 were isolated by vacuum filtration. The solids were washed with ethanol and dried under air (yield: 296 mg, ~96% based on Sb). The  $\mu\text{m}$ -sized microscopic powders of TJU-12 were prepared via manual grinding the bulk crystals.

**Powder X-ray Diffraction (PXRD).** ~20 mg TJU-12 crystals were dried under vacuum prior to PXRD analysis. The data collected by using a Bruker D8 Advance diffractometer at 40 kV, 40 mA for  $\text{Cu K}\alpha$  ( $\lambda = 1.5418 \text{ \AA}$ ) with a scan speed of 0.1 sec/step, a step size of  $0.02^\circ$  in  $2\theta$ , and a  $2\theta$  range of  $5\sim 40^\circ$  under room temperature.

**Single Crystal X-ray Crystallography.** A single crystal of  $0.18 \times 0.16 \times 0.01$  cm was mounted to a glass fiber and placed on the detector, then the diffraction data were collected at 297(2) K using graphite-monochromated  $\text{Mo-K}\alpha$  radiation ( $\lambda = 0.71073 \text{ \AA}$ ) from a fine-focus sealed tube operated at 50 kV and 30 mA on a Bruker SMART APEX II CCD area detector X-ray diffractometer. The initial structure was solved by direct methods and expanded routinely. The model was refined by full-matrix least-squares analysis of  $F^2$  against all reflections. All non-hydrogen atoms were refined with anisotropic thermal displacement parameters.

Programs used were APEX-II v2.1.4, SHELXTL v6.14, and Diamond v3.2. Further details of crystallographic data and structural refinement are summarized in Table S2.

**Fourier-transform Infrared (FT-IR) Spectroscopy.** FT-IR spectra were recorded using a BRUKER ALPHA spectrophotometer in 4000~400  $\text{cm}^{-1}$  region.

**Thermal and Chemical Stability Test.** ~50 mg of as-synthesized crystals were immersed in water,  $\text{CH}_2\text{Cl}_2$  solvents, diluted HCl solution (pH=1), diluted NaOH solution (pH=12) or calcined at 260  $^\circ\text{C}$  in air for 24 h. Then, the remains were isolated by vacuum filtration and washed with ethanol, air-dried before performing PXRD and mass balance measurements.

**Thermogravimetry Analysis (TGA).** TGA data of TJU-12 were collected using a thermal gravimetric analyzer (TA, Q500). The samples were heated from 20  $^\circ\text{C}$  to 700  $^\circ\text{C}$  with a heating rate of 10  $^\circ\text{C}/\text{min}$  in  $\text{N}_2$  atmosphere (60 mL/min).

**Optical Imaging.** Optical microscope images were captured by using a Nikon ECLPSE LV100NPOL. Photo-images were captured using an OPPO R9S Smartphone under the irradiation from a 4W 250 nm UV lamp (67mW/cm<sup>2</sup>).

**UV-Vis Absorption Spectra.** The absorption spectra were recorded in the region of 200-1000 nm at room temperature on a UV-VIS spectrometer (UV-2600, Shimadzu).

**Steady State Photoluminescence Spectra.** The steady state photoluminescence spectra of cm-sized TJU-12 single crystals and  $\mu\text{m}$ -sized TJU-12 microcrystals was obtained by a FLS980 spectrophotometer (Edinburgh Instruments).

**Photoluminescence quantum yield (PLQY).** Absolute PLQY measurements of both bulk and microscopic crystals were performed on FLS 920 spectrophotometer with an integrating sphere (BaSO<sub>4</sub> coating) using single photon counting mode. The focal length of the monochromator was 300 mm. Samples were excited using a 450W Xenon lamp with 3 mm excitation slits width and detected by a Hamamatsu R928p photomultiplier tube. The emission was obtained using 0.2 nm scan step, 0.2 s scan dwell time, and 0.1 mm emission slit width. The PLQEs were calculated by the equation:

$$\varphi = \frac{k_f}{k_a}$$

in which  $k_f$  means the number of emitted photons and  $k_a$  means the number of absorbed photons.

**Time-resolved Photoluminescence.** Time-resolved emission data was collected at room temperature using the FLS980 spectrophotometer. The average lifetime was obtained according to the equation:

$$\tau_{\text{avg}} = \frac{\sum \alpha_i \tau_i^2}{\sum \alpha_i \tau_i} \quad i=1, 2, 3\dots$$

where  $a_i$  represents the amplitude of each component and  $\tau_i$  represents the decay time.

**Photostability tests.** The solid-state samples was treated under continuous irradiation using a 4-W, 365 nm UV lamp in air (~60% relative humidity, room temperature) for a month to test their long-term photostability.

**Computational Methods.** Density function theory calculations were performed by using the CP2K package. Perdew-Burke-Ernzerhof (PBE) functional with Grimme D3 correction was used to describe the system. Unrestricted Kohn-Sham DFT has been used as the electronic structure method in the framework of the Gaussian and plane waves method. The Goedecker-

Teter-Hutter (GTH) pseudopotentials, DZVP-MOLOPT-SR-GTH basis sets were utilized to describe the molecules. A plane-wave energy cut-off of 500 Ry has been employed. The lattice parameters were fixed at the experimentally measured values while the atomic positions were optimized. Following Franck-Condon principle, the optical excitation and emission energies were obtained by calculating the total energy differences between the excited and the ground states using optimized ground-state and excited-state structures, respectively.

## Supporting Figures and Tables

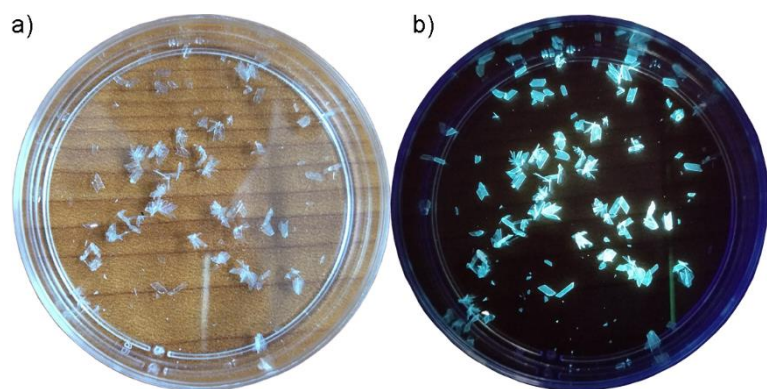

Figure S1. TJU-12 crystals before (a) and after (b) under UV-light.

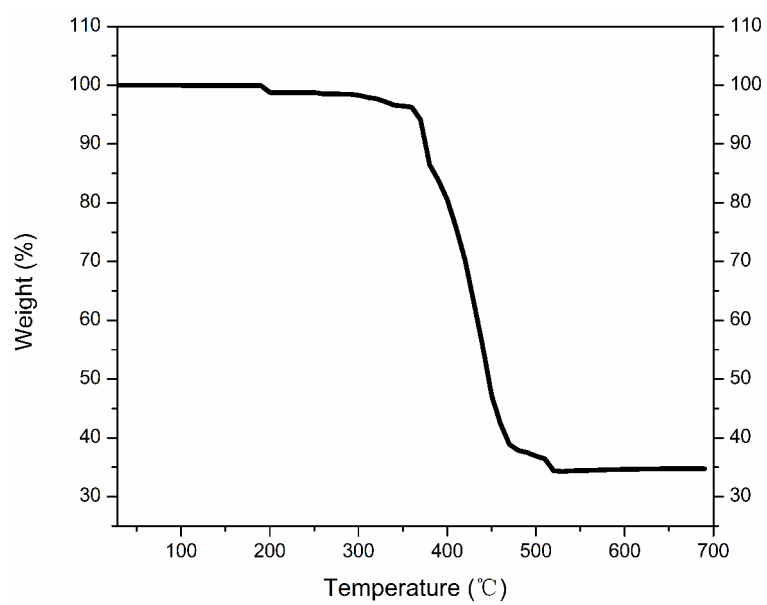

Figure S2. TGA curve of TJU-12.

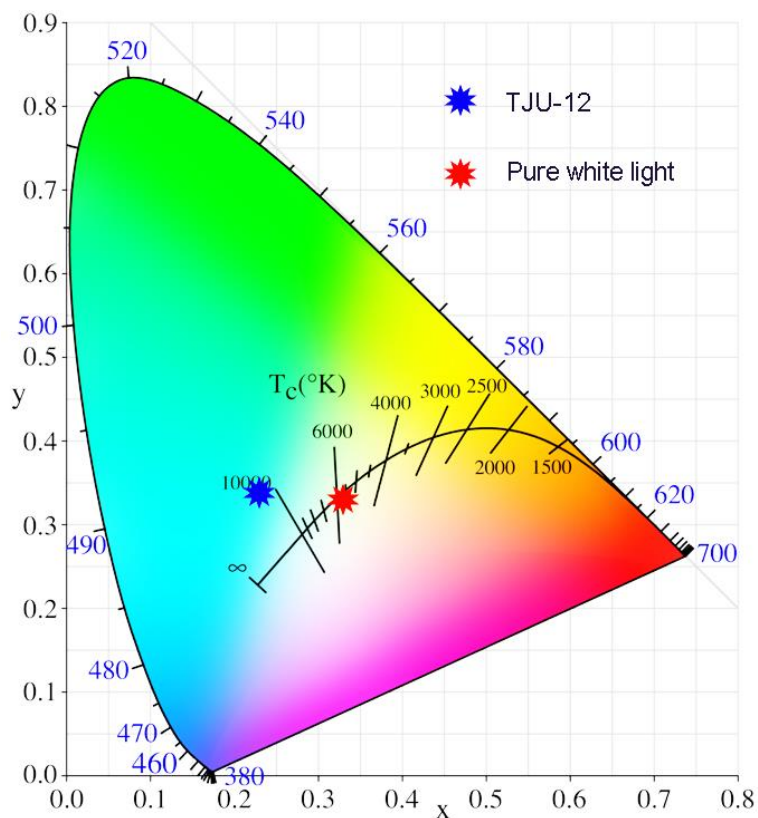

Figure S3. CIE coordinate of TJU-12 (blue) and pure white light (red).

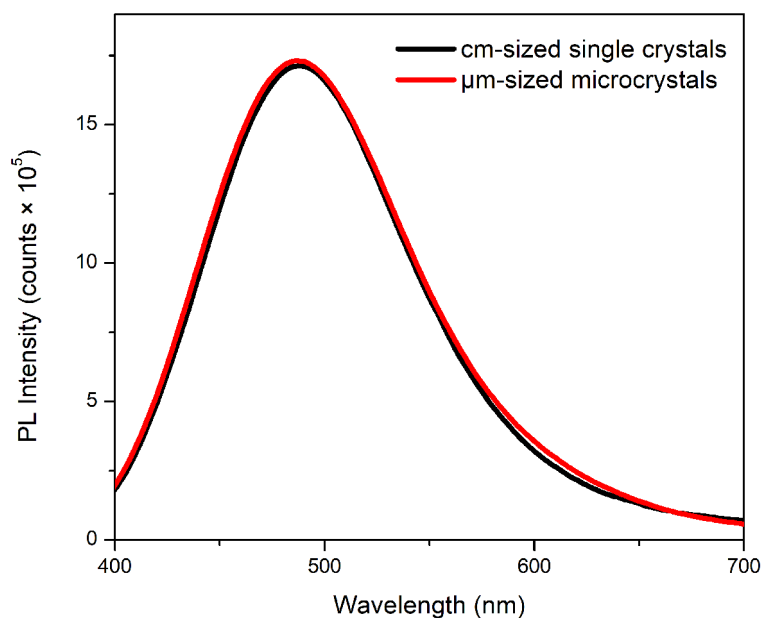

Figure S4. Photoemission of TJU-12 before and after UV-irradiation under atmospheric condition (~60% relative humidity, room temperature) for 30 days.

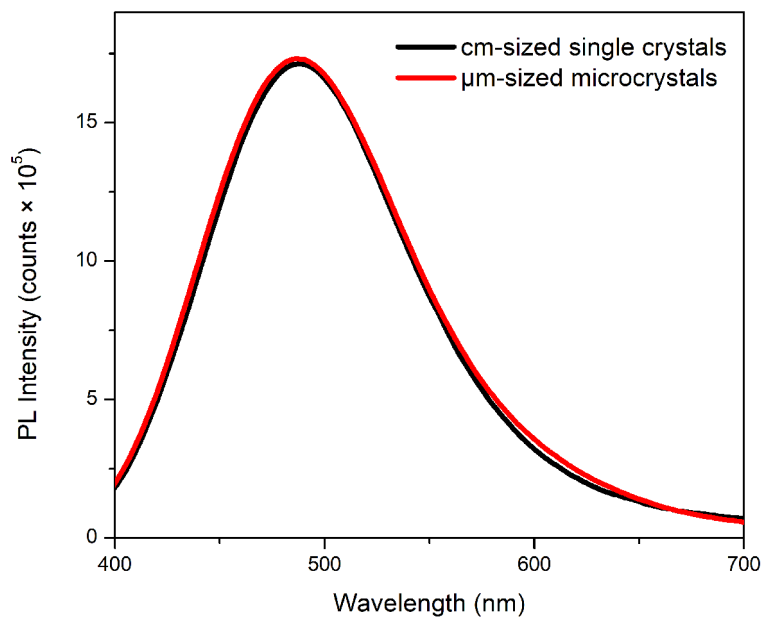

Figure S5. The photoluminescence spectra of cm-sized TJU-12 crystals(black) and μm-sized TJU-12 microcrystals(red).

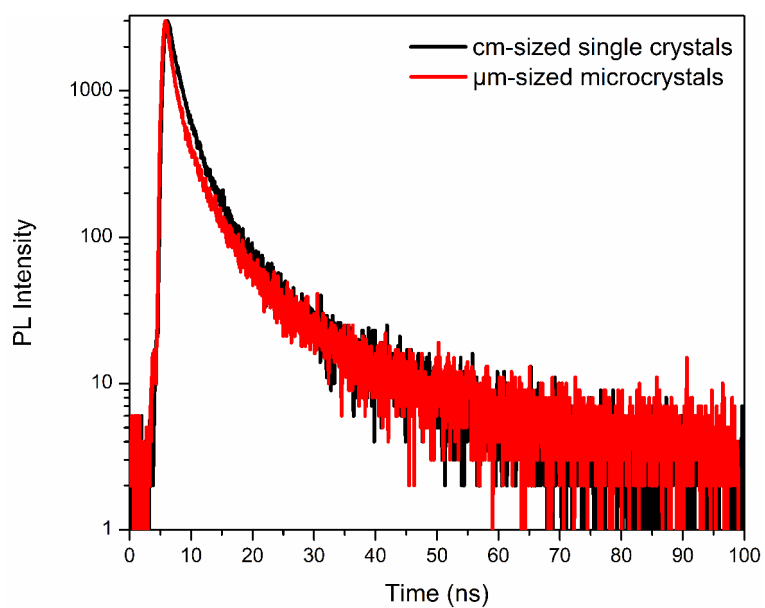

Figure S6. The decay curve of cm-sized TJU-12 single crystals (black) and μm-sized TJU-12 microcrystals (red).



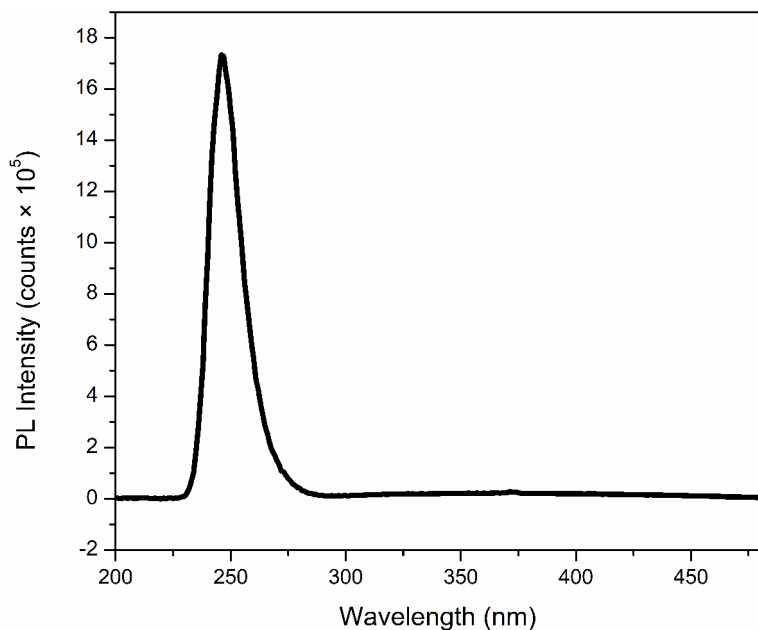

Figure S7. Excitation spectra for the 490 nm emission of TJU-12.

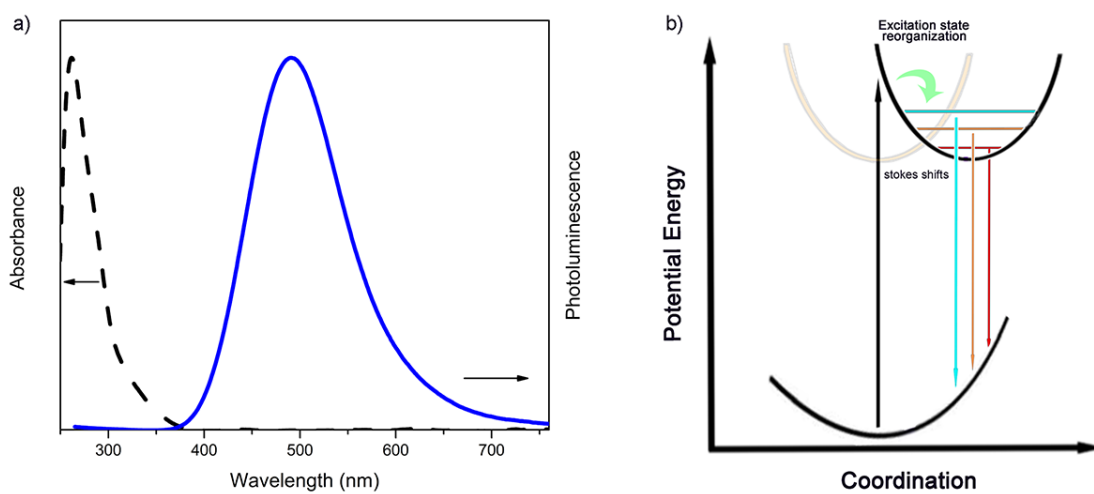

Figure S8. a) Absorption (black) and emission (blue) spectra of TJU-12; b) Schematic of the photophysical processes in  $\text{Sb}^{\text{III}}$ . Upon UV excitation, TJU-12 exhibits a large stokes shift, as a result of shift in the configurational diagram and vibration relaxation upon excitation of the asymmetric structures of  $\text{SbO}_5$  polyhedron.

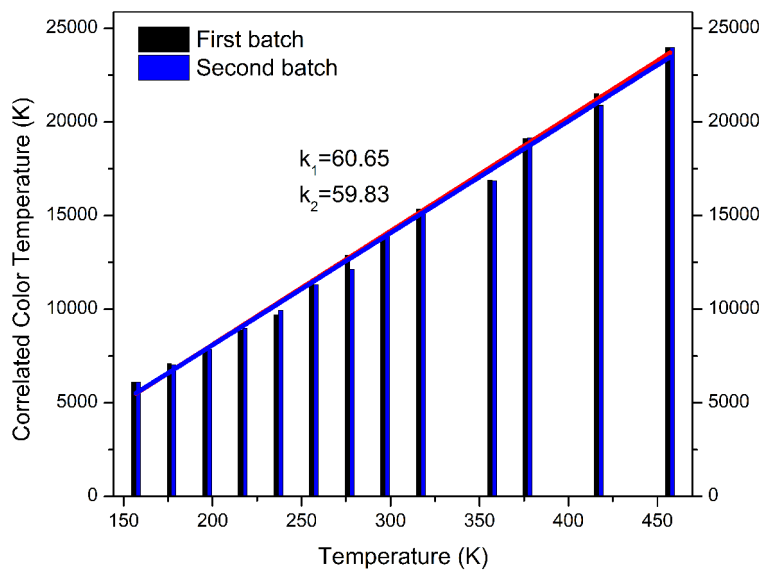

Figure S9. Temperature-dependent correlated color temperature of two different batches of TJU-12.

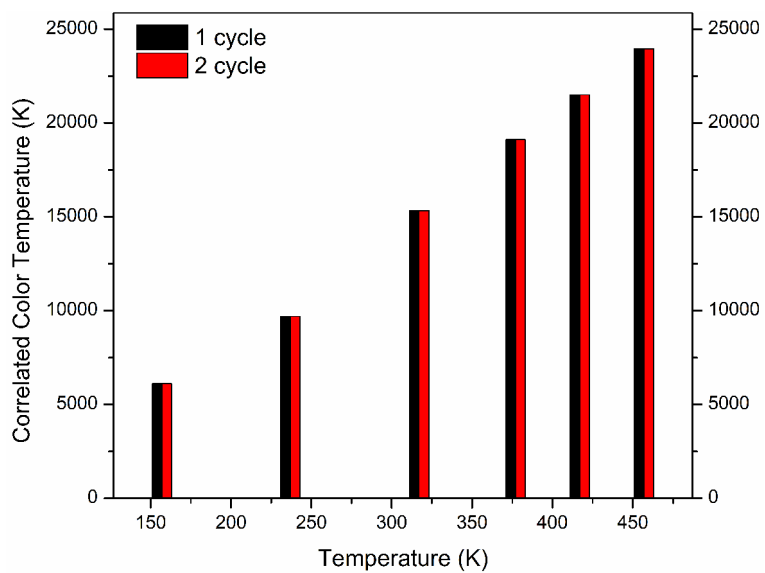

Figure S10. Reversible luminescence changes in two thermo-cycles of TJU-12.

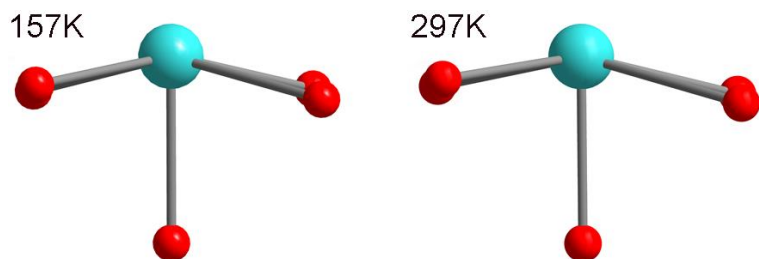

Figure S11. The coordination environment of  $\text{Sb}^{3+}$  at 157 K and 297 K. Cyan and red spheres represent Sb and O atoms, respectively.

Table S1. O-Sb-O angles at 157K and 297K.

|               | 157K   | 297K   |
|---------------|--------|--------|
| O-Sb-O angles | 77.396 | 77.779 |
|               | 78.186 | 78.515 |
|               | 80.537 | 80.813 |
|               | 84.929 | 85.103 |
|               | 80.752 | 80.931 |
|               | 89.191 | 89.162 |
|               | 89.999 | 90.093 |
|               | 93.723 | 93.864 |

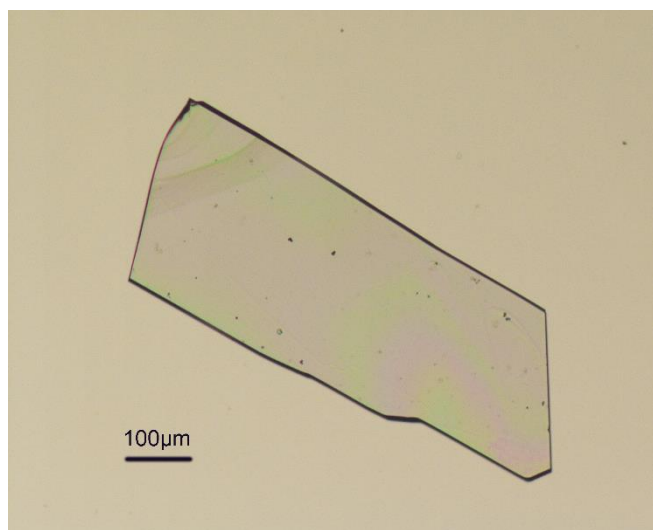

Figure S12. The optical images of TJU-12 crystals.

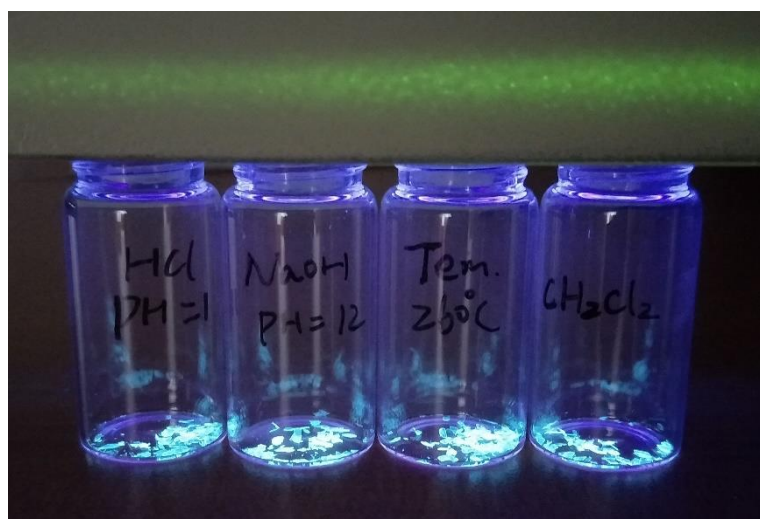

Figure S13. The photo-images of TJU-12 upon UV excitation after chemical or thermal treatment for 24 h.

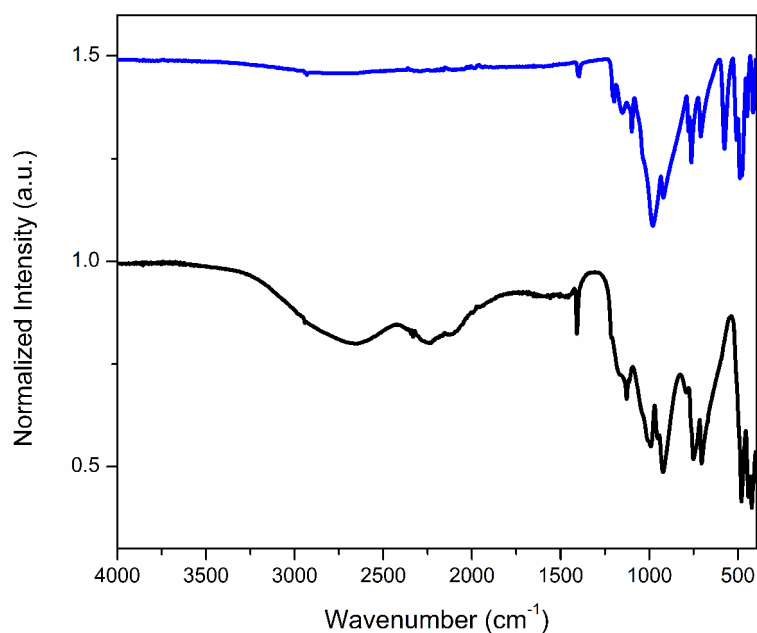

Figure S14. FT-IR spectra of TJU-12 and free EPA ligand.

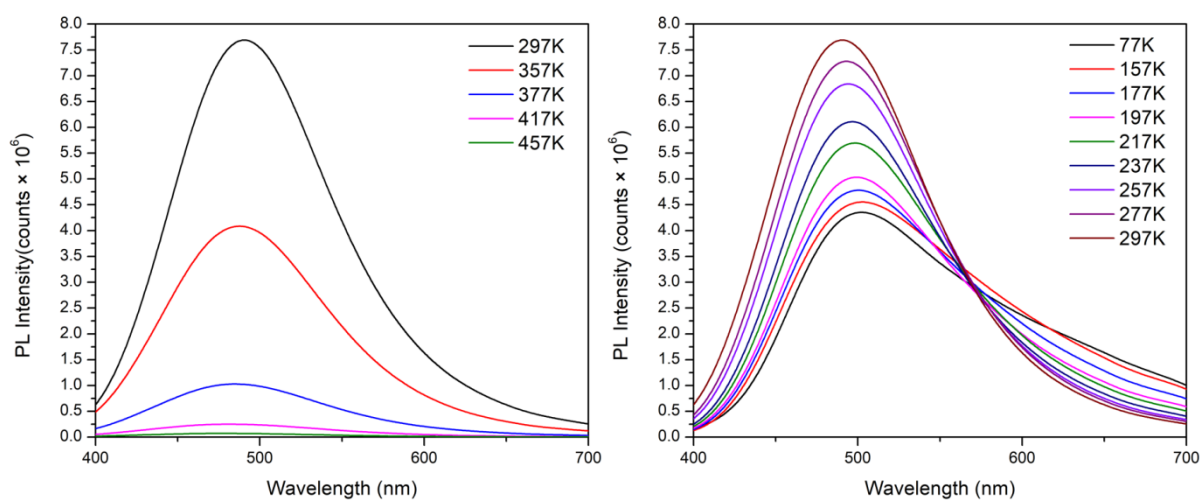

Figure S15. Left: Temperature-dependent photoemission spectra of TJU-12 from 297 K to 457 K upon 247 nm excitation. The photoemission intensity gradually decrease with increasing temperature. Right: Temperature-dependent photoemission spectra of TJU-12 from 77 K to 297 K upon 247 nm excitation. The photoemission intensity gradually increase with increasing temperature.

Table S2. Crystal data and structure refinement for TJU-12.

|                                             |                                                                |
|---------------------------------------------|----------------------------------------------------------------|
| Identification code                         | TJU-12                                                         |
| Empirical formula                           | C <sub>2</sub> H <sub>5</sub> O <sub>6</sub> P <sub>2</sub> Sb |
| Formula weight                              | 308.74                                                         |
| Temperature/K                               | 297.0                                                          |
| Crystal system                              | triclinic                                                      |
| Space group                                 | P-1                                                            |
| a/ Å                                        | 4.6992(11)                                                     |
| b/ Å                                        | 4.9757(12)                                                     |
| c/ Å                                        | 15.625(4)                                                      |
| α/°                                         | 83.397(8)                                                      |
| β/°                                         | 83.782(8)                                                      |
| γ/°                                         | 68.108(7)                                                      |
| Volume/ Å <sup>3</sup>                      | 335.90(14)                                                     |
| Z                                           | 2                                                              |
| ρ <sub>calc</sub> /cm <sup>3</sup>          | 3.043                                                          |
| μ/mm <sup>-1</sup>                          | 4.561                                                          |
| F(000)                                      | 290.0                                                          |
| Crystal size/mm <sup>3</sup>                | 0.18 × 0.16 × 0.01                                             |
| Radiation                                   | MoKα (λ = 0.71073)                                             |
| 2θ range for data collection/°              | 7.896 to 55.174                                                |
| Index ranges                                | -6 ≤ h ≤ 5, -6 ≤ k ≤ 6, -20 ≤ l ≤ 20                           |
| Reflections collected                       | 4694                                                           |
| Independent reflections                     | 1545 [R <sub>int</sub> = 0.0292, R <sub>sigma</sub> = 0.0323]  |
| Data/restraints/parameters                  | 1545/0/100                                                     |
| Goodness-of-fit on F <sup>2</sup>           | 1.119                                                          |
| Final R indexes [I ≥ 2σ (I)]                | R <sub>1</sub> = 0.0199, wR <sub>2</sub> = 0.0475              |
| Final R indexes [all data]                  | R <sub>1</sub> = 0.0218, wR <sub>2</sub> = 0.0484              |
| Largest diff. peak/hole / e Å <sup>-3</sup> | 0.81/-0.99                                                     |

$R_1 = \frac{\sum(|F_o| - |F_c|)}{\sum|F_o|}$ ;  $wR_2 = \left\{ \frac{\sum[w(F_o^2 - F_c^2)^2]}{\sum[w(F_o^2)]^2} \right\}^{1/2}$
